# Supplementary material for: Associations between LPL gene polymorphisms and coronary artery disease: evidence based on an updated and cumulative meta-analysis
Source: Biosci Rep. 2018 Mar 16;38(2):BSR20171642. doi: 10.1042/BSR20171642 (PMC5857905; doi:10.1042/BSR20171642)
Supplement: Supplementary file 1 [file bsr20171642_Supp1.pdf]

**Associations between *LPL* gene polymorphisms and coronary artery disease: evidence based on an updated and cumulative meta-analysis**

**Short title:** *LPL* gene polymorphisms and coronary artery disease

Wen-Qi Ma<sup>1</sup>, Ying Wang<sup>1</sup>, Xi-Qiong Han<sup>1</sup>, Yi Zhu<sup>1</sup>, Nai-Feng Liu<sup>1\*</sup>

<sup>1</sup> Department of Cardiology, Zhongda Hospital, School of Medicine, Southeast University 87 Dingjiaqiao, Nanjing 210009, P.R. China.

\* Corresponding author: Nai-Feng Liu; E-mail: liunf@seu.edu.cn

# Supplementary Information

Supplementary Table 1. MOOSE checklist for meta-analysis of observational studies.

Supplementary Table 2. Characteristics of the individual studies included in the meta-analysis.

Supplementary Table 3. Methodological quality of the selected studies according to the Newcastle-Ottawa Scale.

Supplementary Figure 1. Stratified analysis based on ethnicity for the association between the *LPL* HindIII polymorphism and CAD risk using dominant genetic model (GG+GT vs. TT).

Supplementary Figure 2. Stratified analysis based on sample size for the association between the *LPL* HindIII polymorphism and CAD risk using dominant genetic model (GG+GT vs. TT).

Supplementary Figure 3. Stratified analysis based on ethnicity for the association between the *LPL* S447X polymorphism and CAD risk using dominant genetic model (GG+GC vs. CC).

Supplementary Figure 4. Stratified analysis based on sample size for the association between the *LPL* S447X polymorphism and CAD risk using dominant genetic model (GG+GC vs. CC).

Supplementary Figure 5. Stratified analysis based on sample size for the association between the *LPL* D9N polymorphism and CAD risk using dominant genetic model (AA+GA vs. GG).

Supplementary Figure 6. Stratified analysis based on sample size for the association between the *LPL* N291S polymorphism and CAD risk using dominant genetic model (GG+GA vs. AA).

Supplementary Figure 7. Stratified analysis based on ethnicity for the association between the *LPL* Pvull polymorphism and CAD risk using dominant genetic model (TT+CT vs. CC).

Supplementary Figure 8. Stratified analysis based on sample size for the association between the *LPL* Pvull polymorphism and CAD risk using dominant genetic model (TT+CT vs. CC).

Supplementary Figure 9. Egger’s regression test of publication bias for the association between the *LPL* gene polymorphisms and susceptibility to CAD. (a). HindIII polymorphism; (b). S447X polymorphism; (c). N291S polymorphism; (d). D9N polymorphism; (e). Pvull polymorphism.

Supplementary Figure 10. Sensitivity analysis on the correlation between the *LPL* gene polymorphisms and susceptibility to CAD. (a). sensitivity analysis for HindIII and CAD risk; (b). sensitivity analysis for S447X and CAD risk; (c). sensitivity analysis for N291S and CAD risk; (d). sensitivity analysis for D9N and CAD risk; (e). sensitivity analysis for Pvull and CAD risk;

Supplementary Table 1. MOOSE checklist for meta-analysis of observational studies.

| Item No                                     | Recommendation                                                                                                                                                                                                                                                               | Reported on Page No |
|---------------------------------------------|------------------------------------------------------------------------------------------------------------------------------------------------------------------------------------------------------------------------------------------------------------------------------|---------------------|
| Reporting of background should include      |                                                                                                                                                                                                                                                                              |                     |
| 1                                           | Problem definition                                                                                                                                                                                                                                                           | 2-3                 |
| 2                                           | Hypothesis statement                                                                                                                                                                                                                                                         | 2-3                 |
| 3                                           | Description of study outcome(s)                                                                                                                                                                                                                                              | 2-3                 |
| 4                                           | Type of exposure or intervention used                                                                                                                                                                                                                                        | 2-3                 |
| 5                                           | Type of study designs used                                                                                                                                                                                                                                                   | 2-3                 |
| 6                                           | Study population                                                                                                                                                                                                                                                             | 2-3                 |
| Reporting of search strategy should include |                                                                                                                                                                                                                                                                              |                     |
| 7                                           | Qualifications of searchers (eg, librarians and investigators)                                                                                                                                                                                                               | 4                   |
| 8                                           | Search strategy, including time period included in the synthesis and key words                                                                                                                                                                                               | 4                   |
| 9                                           | Effort to include all available studies, including contact with authors                                                                                                                                                                                                      | 4                   |
| 10                                          | Databases and registries searched                                                                                                                                                                                                                                            | 4                   |
| 11                                          | Search software used, name and version, including special features used (eg, explosion)                                                                                                                                                                                      | 5                   |
| 12                                          | Use of hand searching (eg, reference lists of obtained articles)                                                                                                                                                                                                             | 4                   |
| 13                                          | List of citations located and those excluded, including justification                                                                                                                                                                                                        | 4-5                 |
| 14                                          | Method of addressing articles published in languages other than English                                                                                                                                                                                                      | 4                   |
| 15                                          | Method of handling abstracts and unpublished studies                                                                                                                                                                                                                         | 5                   |
| 16                                          | Description of any contact with authors                                                                                                                                                                                                                                      | No                  |
| Reporting of methods should include         |                                                                                                                                                                                                                                                                              |                     |
| 17                                          | Description of relevance or appropriateness of studies assembled for assessing the hypothesis to be tested                                                                                                                                                                   | 4-5                 |
| 18                                          | Rationale for the selection and coding of data (eg, sound clinical principles or convenience)                                                                                                                                                                                | 4-5                 |
| 19                                          | Documentation of how data were classified and coded (eg, multiple raters, blinding and interrater reliability)                                                                                                                                                               | 4-6                 |
| 20                                          | Assessment of confounding (eg, comparability of cases and controls in studies where appropriate)                                                                                                                                                                             | 4-6                 |
| 21                                          | Assessment of study quality, including blinding of quality assessors, stratification or regression on possible predictors of study results                                                                                                                                   | 4-6                 |
| 22                                          | Assessment of heterogeneity                                                                                                                                                                                                                                                  | 5-6                 |
| 23                                          | Description of statistical methods (eg, complete description of fixed or random effects models, justification of whether the chosen models account for predictors of study results, dose-response models, or cumulative meta-analysis) in sufficient detail to be replicated | 5-6                 |
| 24                                          | Provision of appropriate tables and graphics                                                                                                                                                                                                                                 | 5-6                 |
| Reporting of results should include         |                                                                                                                                                                                                                                                                              |                     |
| 25                                          | Graphic summarizing individual study estimates and overall estimate                                                                                                                                                                                                          | 6-9                 |
| 26                                          | Table giving descriptive information for each study included                                                                                                                                                                                                                 | Table1              |
| 27                                          | Results of sensitivity testing (eg, subgroup analysis)                                                                                                                                                                                                                       | 6-14                |
| 28                                          | Indication of statistical uncertainty of findings                                                                                                                                                                                                                            | 6-9                 |
| Reporting of discussion should include      |                                                                                                                                                                                                                                                                              |                     |
| 29                                          | Quantitative assessment of bias (eg, publication bias)                                                                                                                                                                                                                       | 10-11               |
| 30                                          | Justification for exclusion (eg, exclusion of non-English language citations)                                                                                                                                                                                                | 10-11               |
| 31                                          | Assessment of quality of included studies                                                                                                                                                                                                                                    | 14-16               |
| Reporting of conclusions should include     |                                                                                                                                                                                                                                                                              |                     |
| 32                                          | Consideration of alternative explanations for observed results                                                                                                                                                                                                               | 10-11               |
| 33                                          | Generalization of the conclusions (ie, appropriate for the data presented and within the domain of the literature review)                                                                                                                                                    | 10-11               |
| 34                                          | Guidelines for future research                                                                                                                                                                                                                                               | 11                  |
| 35                                          | Disclosure of funding source                                                                                                                                                                                                                                                 | 11                  |

Supplementary Table 2. Characteristics of the individual studies included in the meta-analysis.

| First Author<br>/Year | Country         | Disease | Source<br>of<br>Controls | Gene-typing<br>Methods | Sample Size    | Genotype Distribution |                       | $P_{HWE}$ | N<br>O<br>S |
|-----------------------|-----------------|---------|--------------------------|------------------------|----------------|-----------------------|-----------------------|-----------|-------------|
|                       |                 |         |                          |                        | Cases/Controls | Cases                 | Controls              |           |             |
| Hind III              |                 |         |                          |                        |                | TT/TG/GG              | TT/TG/GG              |           |             |
| Thorn 1990            | UK              | CAD     | PB                       | PCR                    | 63/108         | 37/23/3               | 37/51/20              | 0.743     | 7           |
| Mattu 1994            | Welsh           | CAD     | PB                       | PCR-RFLP               | 90/123         | 50/34/6               | 72/45/6               | 0.760     | 8           |
| Jemaa 1995            | France          | CAD     | PB                       | PCR                    | 614/733        | 318/258/38            | 343/314/76            | 0.742     | 7           |
| Anderson 1999         | America         | CAD     | HB                       | PCR                    | 483/168        | 259/194/30            | 94/52/22              | >0.05     | 7           |
| Holmer 2000           | Germany         | MI      | PB                       | PCR                    | 1159/1361      | 616/456/87            | 697/564/100           | 0.332     | 8           |
| Abu-Amero 2003        | Saudi<br>Arabia | CAD     | HB                       | PCR                    | 352/410        | 189/138/25            | 206/173/31            | 0.518     | 6           |
| Goodarzi 2003         | USA             | CAD     | PB                       | PCR                    | 77/164         | 39/33/5               | 105/52/7              | 0.861     | 7           |
| Whiting 2005          | America         | CAD     | HB                       | PCR                    | 713/196        | 385/269/59            | 103/77/16             | 0.763     | 7           |
| Pasalić 2006          | Croatia         | CAD     | HB                       | PCR-RFLP               | 132/98         | 78/46/8               | 47/45/6               | 0.262     | 7           |
| AshokKumar 2010       | India           | CAD     | HB                       | PCR                    | 414/424        | 220/168/26            | 245/158/21            | 0.486     | 7           |
| Abd 2011              | Egypt           | MI      | HB                       | PCR                    | 200/100        | 120/70/10             | 50/36/14              | 0.834     | 7           |
| Al-Jafari 2012        | Saudi<br>Arabia | CAD     | HB                       | PCR                    | 120/65         | 61/53/6               | 29/23/13              | 0.050     | 7           |
| Rebhi 2012            | Tunisia         | CAD     | HB                       | PCR–RFLP               | 212/104        | 114/83/15             | 47/39/18              | 0.569     | 7           |
| Abd-El-Aziz 2013      | Egypt           | CAD     | HB                       | PCR-RFLP               | 156/154        | 100/53/3              | 78/54/22              | >0.05     | 7           |
| Tanguturi 2013        | India           | MI      | PB                       | PCR                    | 202/210        | 98/72/32              | 70/68/72              | >0.05     | 7           |
| Daoud 2013            | Saudi<br>Arabia | CAD     | HB                       | PCR-RFLP               | 226/103        | 102/81/43             | 42/35/26              | >0.05     | 7           |
| Ahmadi 2015           | Iran            | CAD     | HB                       | PCR-RFLP               | 108/89         | 61/41/6               | 53/33/3               | 0.430     | 6           |
| Bahrami 2015          | Iran            | MI      | HB                       | PCR-RFLP               | 211/203        | 116/81/14             | 101/83/19             | 0.745     | 7           |
| S477X                 |                 |         |                          |                        |                | CC/CG/GG              | CC/CG/GG              |           |             |
| Peacock 1992          | Sweden          | CAD     | HB                       | PCR                    | 86/87          | 77/9 <sup>a</sup>     | 78/9 <sup>a</sup>     | >0.05     | 7           |
| Mattu 1994            | Welsh           | CAD     | PB                       | PCR-RFLP               | 90/123         | 76/14/0               | 101/21/1              | 0.936     | 8           |
| Jemaa 1995            | France          | CAD     | PB                       | PCR                    | 649/730        | 525/118/6             | 563/154/13            | 0.514     | 7           |
| Zhang 1995            | Germany         | CAD     | HB                       | PCR                    | 243/86         | 195/46/2              | 68/17/1               | 0.959     | 7           |
| Gagné 1999            | America         | CAD     | PB                       | PCR-RFLP               | 120/2138       | 107/13 <sup>a</sup>   | 1772/366 <sup>a</sup> | >0.05     | 7           |
| Arca 2000             | Italy           | CAD     | HB                       | PCR-RFLP               | 416/407        | 329/87 <sup>a</sup>   | 321/86 <sup>a</sup>   | >0.05     | 6           |
| Moennig 2000          | Germany         | CAD     | PB                       | PCR                    | 229/150        | 198/28/3              | 113/37/0              | 0.085     | 8           |
| Sawano 2001           | Japan           | CAD     | PB                       | PCR                    | 93/96          | 82/10/1               | 71/23/2               | 0.932     | 8           |
| VAN 2001              | Australia.      | CAD     | PB                       | PCR                    | 516/589        | 438/78 <sup>a</sup>   | 498/91 <sup>a</sup>   | >0.05     | 7           |
| Myllykangas 2001      | Finland         | CAD     | HB                       | PCR                    | 149/113        | 138/11 <sup>a</sup>   | 89/24 <sup>a</sup>    | >0.05     | 7           |
| Ferencak 2003         | Croatia         | CAD     | HB                       | PCR                    | 479/200        | 378/97/4              | 167/32/1              | 0.686     | 7           |

|                  |              |     |    |          |           |                       |                       |       |   |
|------------------|--------------|-----|----|----------|-----------|-----------------------|-----------------------|-------|---|
| Goodarzi 2003    | USA          | CAD | PB | PCR      | 77/164    | 61/15/1               | 142/22/0              | >0.05 | 7 |
| Martin 2004      | UK           | MI  | HB | PCR-RFLP | 547/505   | 440/104/3             | 402/99/4              | 0.483 | 7 |
| Baum 2006        | China        | MI  | HB | PCR      | 231/313   | 180/51/0              | 248/64/1              | 0.137 | 6 |
| Pasalić 2006     | Croatia      | CAD | HB | PCR-RFLP | 132/98    | 113/19/0              | 69/28/1               | 0.312 | 7 |
| Yamada 2006      | Japan        | MI  | HB | PCR      | 1192/2291 | 949/231/12            | 1699/547/45           | 0.900 | 7 |
| Ak 2007          | Turkey       | CAD | HB | PCR      | 40/66     | 33/7/0                | 57/8/1                | 0.275 | 6 |
| Katia 2007       | Brazil       | CAD | PB | PCR-RFLP | 313/150   | 257/47/9              | 115/34/1              | 0.110 | 7 |
| Aydogan 2009     | Turkey       | CAD | PB | PCR-RFLP | 41/23     | 27/4/10               | 17/4/2                | 0.058 | 8 |
| AshokKumar 2010  | India        | CAD | HB | PCR      | 414/424   | 348/62/4              | 329/87/8              | 0.427 | 7 |
| Bhanushali 2010  | India        | CAD | HB | PCR      | 90/150    | 78/11/1               | 127/21/2              | 0.306 | 7 |
| Abd 2011         | Egypt        | MI  | HB | PCR      | 200/100   | 164/32/4              | 70/26/4               | 0.431 | 7 |
| Agirbasli 2011   | Turkey       | CAD | HB | PCR-RFLP | 97/81     | 86/10/1               | 64/16/1               | 1.000 | 7 |
| Al-Jafari 2012   | Saudi Arabia | CAD | HB | PCR      | 120/65    | 100/20/0              | 57/8/0                | 0.597 | 7 |
| Daoud 2013       | Saudi Arabia | CAD | HB | PCR-RFLP | 226/103   | 185/41/0              | 92/11/0               | 0.567 | 7 |
| Ahmadi 2015      | Iran         | CAD | HB | PCR-RFLP | 115/89    | 58/23/34              | 75/7/7                | >0.05 | 6 |
| Abdel 2015       | Sudan        | CAD | HB | PCR-RFLP | 54/59     | 46/8 <sup>a</sup>     | 51/8 <sup>a</sup>     | >0.05 | 5 |
| N291S            |              |     |    |          |           | AA/AG/GG              | AA/AG/GG              |       |   |
| Wittrup 1997     | Danish       | IHD | PB | PCR      | 1715/9214 | 1614/101 <sup>b</sup> | 8762/452 <sup>b</sup> | >0.05 | 8 |
| Arca 2000        | Italy        | CAD | HB | PCR-RFLP | 416/407   | 398/18/0              | 391/16/0              | 0.686 | 6 |
| Moennig 2000     | Germany      | CAD | PB | PCR      | 229/150   | 219/10/0              | 140/10/0              | 0.673 | 8 |
| VAN 2001         | Australia.   | CAD | PB | PCR      | 599/664   | 579/20 <sup>b</sup>   | 642/22 <sup>b</sup>   | >0.05 | 7 |
| Mylylkangas 2001 | Finland      | CAD | HB | PCR      | 149/113   | 140/9 <sup>b</sup>    | 110/3 <sup>b</sup>    | >0.05 | 7 |
| Ferencak 2003    | Croatia      | CAD | HB | PCR      | 479/200   | 472/7/0               | 192/8/0               | 0.773 | 7 |
| Martin 2004      | UK           | MI  | HB | PCR-RFLP | 547/505   | 527/20/0              | 490/15/0              | 0.242 | 7 |
| Keavney 2004     | UK           | MI  | PB | PCR      | 4524/3332 | 4359/162/3            | 3216/112/4            | >0.05 | 7 |
| Tripathi 2010    | India        | CAD | HB | PCR      | 329/331   | 295/34/0              | 308/23/0              | 0.513 | 6 |
| Rebhi 2012       | Tunisia      | CAD | HB | PCR–RFLP | 212/104   | 211/1/0               | 103/1/0               | >0.05 | 7 |
| Abdel 2015       | Sudan        | CAD | HB | PCR-RFLP | 73/54     | 51/22 <sup>b</sup>    | 37/17 <sup>b</sup>    | >0.05 | 5 |
| D9N              |              |     |    |          |           | GG/GA/AA              | GG/GA/AA              |       |   |
| Zhang 1995       | Germany      | CAD | HB | PCR      | 243/86    | 233/10/0              | 84/2/0                | 0.913 | 7 |
| Arca 2000        | Italy        | CAD | HB | PCR-RFLP | 416/407   | 382/17/0              | 373/17/0              | 0.660 | 6 |
| VAN 2001         | Australia.   | CAD | PB | PCR      | 631/606   | 597/34 <sup>c</sup>   | 592/14 <sup>c</sup>   | >0.05 | 7 |
| Martin 2004      | UK           | MI  | HB | PCR-RFLP | 547/505   | 534/13/0              | 493/12/0              | 0.787 | 7 |
| Izar 2009        | Brazil       | MI  | PB | PCR-RFLP | 379/583   | 305/71/3              | 507/73/3              | 0.832 | 8 |
| Bhanushali 2010  | India        | CAD | HB | PCR      | 90/150    | 89/1/0                | 146/4/0               | 0.869 | 7 |
| Rebhi 2012       | Tunisia      | CAD | HB | PCR–RFLP | 212/104   | 9/47/156              | 3/17/84               | 0.848 | 7 |
| Abdel 2015       | Sudan        | CAD | HB | PCR-RFLP | 65/78     | 62/3 <sup>c</sup>     | 75/3 <sup>c</sup>     | >0.05 | 5 |
| Pvull            |              |     |    |          |           | CC/CT/TT              | CC/CT/TT              |       |   |
| Thorn 1990       | UK           | CAD | PB | PCR      | 60/93     | 15/39/6               | 30/43/20              | 0.534 | 7 |

|                |              |     |    |          |           |               |              |       |   |
|----------------|--------------|-----|----|----------|-----------|---------------|--------------|-------|---|
| Peacock 1992   | Sweden       | CAD | HB | PCR      | 85/90     | 29/38/18      | 29/42/19     | 0.602 | 7 |
| Mattu 1994     | Welsh        | CAD | PB | PCR-RFLP | 90/123    | 28/42/20      | 36/64/23     | 0.561 | 8 |
| Jemaa 1995     | France       | CAD | PB | PCR      | 614/732   | 184/302/128   | 188/357/187  | 0.506 | 7 |
| Wang 1996      | Australia    | CAD | HB | PCR-RFLP | 350/125   | 103/180/67    | 38/59/28     | 0.577 | 7 |
| Stepanov 1998  | Russia       | CAD | PB | PCR-RFLP | 93/119    | 26/52/15      | 29/57/33     | 0.655 | 7 |
| Anderson 1999  | America      | CAD | HB | PCR      | 483/168   | 142/236/105   | 60/76/32     | 0.368 | 7 |
| Abu-Amero 2003 | Saudi Arabia | CAD | HB | PCR      | 431/511   | 138/225/68    | 182/248/81   | 0.819 | 6 |
| Isbir 2003     | Turkey       | CAD | PB | PCR      | 100/72    | 37/49/14      | 20/40/12     | 0.289 | 7 |
| Duman 2004     | Turkey       | CAD | HB | PCR      | 78/49     | 25/39/14      | 14/16/19     | 0.017 | 6 |
| Keavney 2004   | UK           | MI  | PB | PCR      | 4569/3377 | 957/2266/1346 | 721/1694/962 | 0.626 | 7 |
| Georgiev 2008  | Macedon      | CAD | HB | PCR-RFLP | 109/32    | 25/58/26      | 5/20/7       | 0.149 | 7 |
| Al-Jafari 2012 | Saudi Arabia | CAD | HB | PCR      | 120/65    | 50/52/18      | 25/28/12     | 0.408 | 7 |
| Rebhi 2012     | Tunisia      | CAD | HB | PCR–RFLP | 212/104   | 60/90/62      | 20/55/29     | 0.503 | 7 |
| Daoud 2013     | Saudi Arabia | CAD | HB | PCR-RFLP | 226/103   | 89/102/35     | 46/44/13     | 0.627 | 7 |
| Bahrami 2015   | Iran         | MI  | HB | PCR-RFLP | 211/203   | 78/101/32     | 72/93/38     | 0.414 | 7 |

Abbreviations: CAD, coronary artery disease; MI, myocardial infarction; PCR, polymerase chain reaction; PCR-RFLP, polymerase chain reaction-restriction fragment length polymorphism; HWE, Hardy–Weinberg equilibrium for controls; NOS, Newcastle–Ottawa quality scale; IHD, ischemic heart disease; PB, population-based control; HB, hospital-based control. Note: a, CC vs. GC+GG; b, AA vs. AG+GG; c, GG vs. AG+AA.

Supplementary Table 3. Methodological quality of the selected studies according to the Newcastle-Ottawa Scale.

| Study            | Adequacy of Case Definition | Representative ness of the cases | Selection of controls | Definition of controls | Comparability of cases/controls | Ascertainment of exposure | Same method of ascertainment | Non-Response rate |
|------------------|-----------------------------|----------------------------------|-----------------------|------------------------|---------------------------------|---------------------------|------------------------------|-------------------|
| Thorn 1990       | ★                           | ★                                | ★                     | ★                      | ★                               | ★                         | ★                            | N/A               |
| Peacock 1992     | ★                           | ★                                | N/A                   | ★                      | ★★                              | ★                         | ★                            | N/A               |
| Mattu 1994       | ★                           | ★                                | ★                     | ★                      | ★★                              | ★                         | ★                            | N/A               |
| Jemaa 1995       | ★                           | ★                                | ★                     | ★                      | ★                               | ★                         | ★                            | N/A               |
| Zhang 1995       | ★                           | ★                                | N/A                   | ★                      | ★★                              | ★                         | ★                            | N/A               |
| Wang 1996        | ★                           | ★                                | N/A                   | ★                      | ★★                              | ★                         | ★                            | N/A               |
| Wittrup 1997     | ★                           | ★                                | ★                     | ★                      | ★★                              | ★                         | ★                            | N/A               |
| Stepanov 1998    | ★                           | ★                                | ★                     | ★                      | ★                               | ★                         | ★                            | N/A               |
| Anderson 1999    | ★                           | ★                                | N/A                   | ★                      | ★★                              | ★                         | ★                            | N/A               |
| Gagné 1999       | ★                           | ★                                | ★                     | ★                      | ★                               | ★                         | ★                            | N/A               |
| Holmer 2000      | ★                           | ★                                | ★                     | ★                      | ★★                              | ★                         | ★                            | N/A               |
| Arca 2000        | ★                           | ★                                | N/A                   | ★                      | ★                               | ★                         | ★                            | N/A               |
| Moennig 2000     | ★                           | ★                                | ★                     | ★                      | ★★                              | ★                         | ★                            | N/A               |
| VAN 2001         | ★                           | ★                                | ★                     | ★                      | ★                               | ★                         | ★                            | N/A               |
| Myllykangas 2001 | ★                           | ★                                | N/A                   | ★                      | ★★                              | ★                         | ★                            | N/A               |
| Sawano 2001      | ★                           | ★                                | ★                     | ★                      | ★★                              | ★                         | ★                            | N/A               |
| Abu-Amero 2003   | ★                           | ★                                | N/A                   | ★                      | ★                               | ★                         | ★                            | N/A               |
| Goodarzi 2003    | ★                           | ★                                | ★                     | ★                      | ★                               | ★                         | ★                            | N/A               |
| Ferencak 2003    | ★                           | ★                                | N/A                   | ★                      | ★★                              | ★                         | ★                            | N/A               |
| Isbir 2003       | ★                           | ★                                | ★                     | ★                      | ★                               | ★                         | ★                            | N/A               |
| Martin 2004      | ★                           | ★                                | N/A                   | ★                      | ★★                              | ★                         | ★                            | N/A               |
| Keavney 2004     | ★                           | ★                                | ★                     | ★                      | ★                               | ★                         | ★                            | N/A               |
| Duman 2004       | ★                           | ★                                | N/A                   | ★                      | ★                               | ★                         | ★                            | N/A               |
| Whiting 2005     | ★                           | ★                                | N/A                   | ★                      | ★★                              | ★                         | ★                            | N/A               |
| Baum 2006        | ★                           | ★                                | N/A                   | ★                      | ★                               | ★                         | ★                            | N/A               |
| Pasalić 2006     | ★                           | ★                                | N/A                   | ★                      | ★★                              | ★                         | ★                            | N/A               |
| Yamada 2006      | ★                           | ★                                | N/A                   | ★                      | ★★                              | ★                         | ★                            | N/A               |
| Ak 2007          | ★                           | ★                                | N/A                   | ★                      | ★                               | ★                         | ★                            | N/A               |
| Katia 2007       | ★                           | ★                                | ★                     | ★                      | ★                               | ★                         | ★                            | N/A               |
| Georgiev 2008    | ★                           | ★                                | N/A                   | ★                      | ★★                              | ★                         | ★                            | N/A               |
| Izar 2009        | ★                           | ★                                | ★                     | ★                      | ★★                              | ★                         | ★                            | N/A               |
| Aydogan 2009     | ★                           | ★                                | ★                     | ★                      | ★★                              | ★                         | ★                            | N/A               |
| AshokKumar 2010  | ★                           | ★                                | N/A                   | ★                      | ★★                              | ★                         | ★                            | N/A               |
| Bhanushali 2010  | ★                           | ★                                | N/A                   | ★                      | ★★                              | ★                         | ★                            | N/A               |
| Tripathi 2010    | ★                           | ★                                | N/A                   | ★                      | ★                               | ★                         | ★                            | N/A               |
| Abd 2011         | ★                           | ★                                | N/A                   | ★                      | ★★                              | ★                         | ★                            | N/A               |

|                     |   |   |     |   |    |     |   |     |
|---------------------|---|---|-----|---|----|-----|---|-----|
| Agirbasli 2011      | ★ | ★ | N/A | ★ | ★★ | ★   | ★ | N/A |
| Al-Jafari 2012      | ★ | ★ | N/A | ★ | ★★ | ★   | ★ | N/A |
| Rebhi 2012          | ★ | ★ | N/A | ★ | ★★ | ★   | ★ | N/A |
| Abd-El-Aziz<br>2013 | ★ | ★ | N/A | ★ | ★★ | ★   | ★ | N/A |
| Tanguturi 2013      | ★ | ★ | ★   | ★ | ★  | ★   | ★ | N/A |
| Daoud 2013          | ★ | ★ | N/A | ★ | ★★ | ★   | ★ | N/A |
| Ahmadi 2015         | ★ | ★ | N/A | ★ | ★  | ★   | ★ | N/A |
| Abdel 2015          | ★ | ★ | N/A | ★ | ★  | N/A | ★ | N/A |
| Bahrami 2015        | ★ | ★ | N/A | ★ | ★★ | ★   | ★ | N/A |

This table identifies ‘high’ quality choices with a ‘star’. A study can be awarded a maximum of 1 star for each numbered item within the Selection and Exposure categories. A maximum of 2 stars can be given for Comparability. ★, Yes; N/A, not applicable.

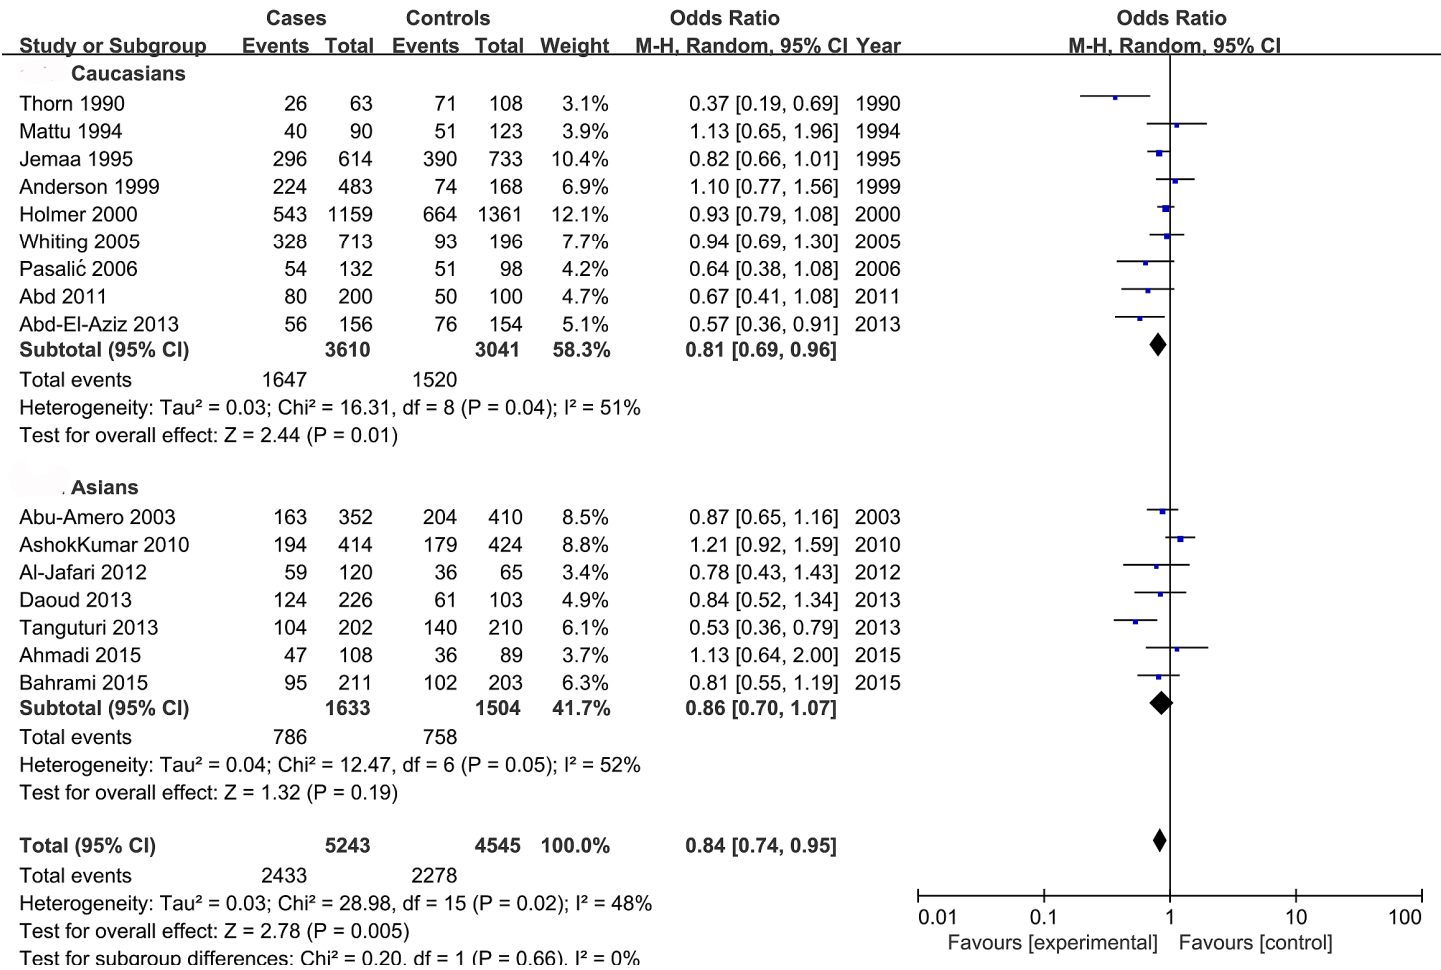

**Supplementary Figure 1. Stratified analysis based on ethnicity for the association between the *LPL* HindIII polymorphism and CAD risk using dominant genetic model (GG+GT vs. TT).**

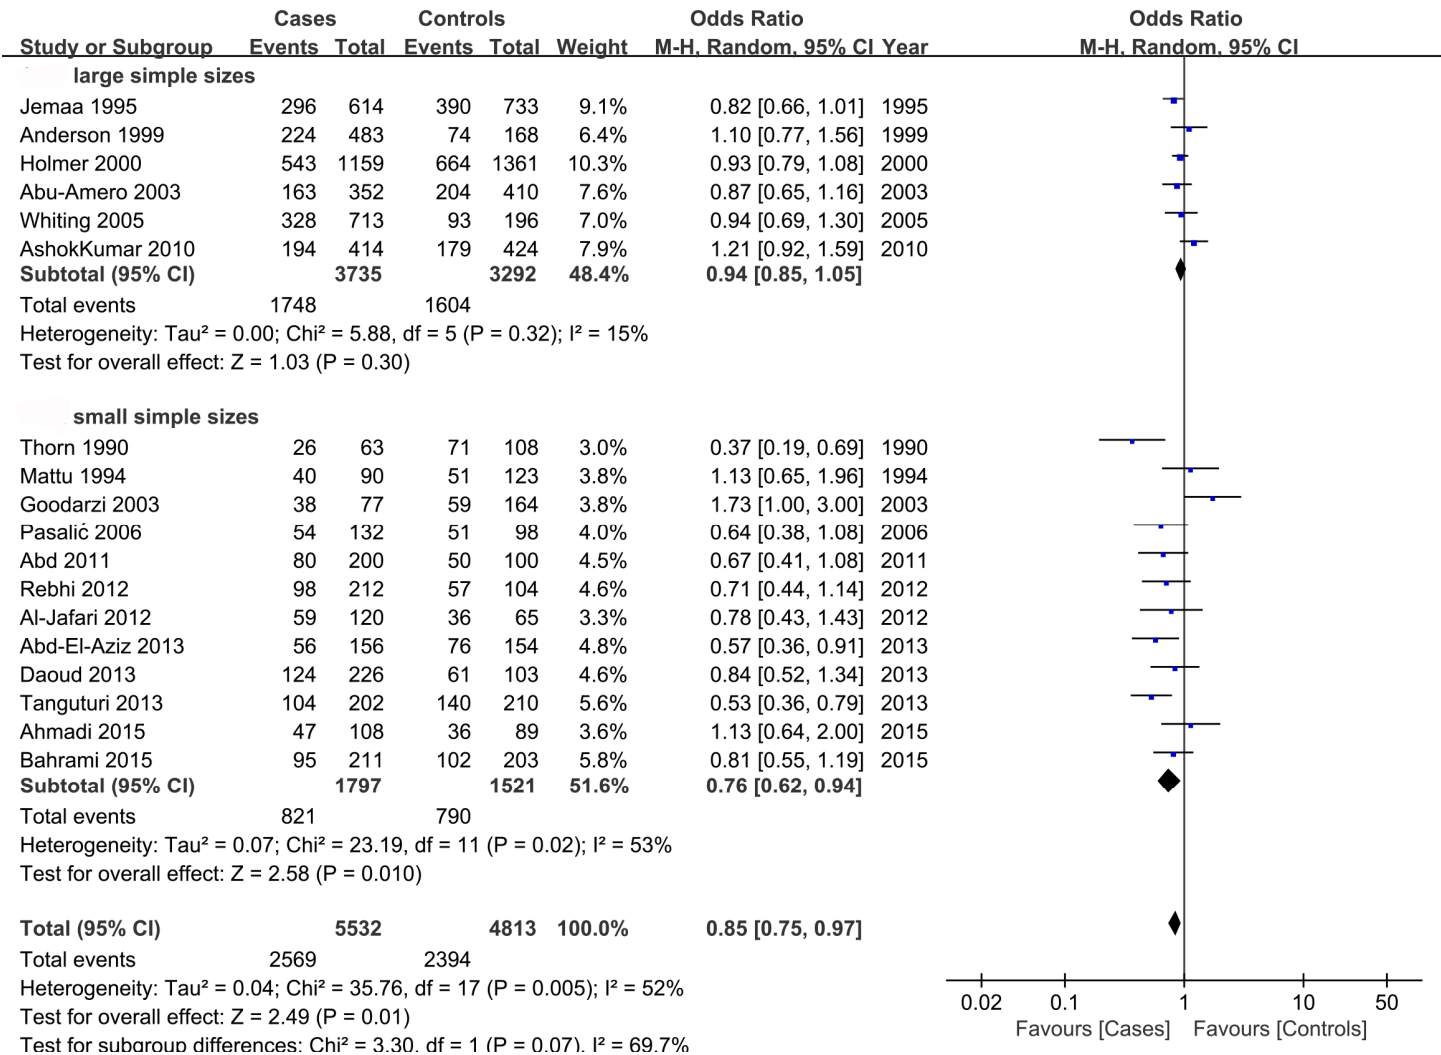

**Supplementary Figure 2. Stratified analysis based on sample size for the association between the *LPL* HindIII polymorphism and CAD risk using dominant genetic model (GG+GT vs. TT).**

| Study or Subgroup                                                                             | Cases  |             | Controls |             | Weight        | Odds Ratio          |                     | Year | Odds Ratio          |                     |
|-----------------------------------------------------------------------------------------------|--------|-------------|----------|-------------|---------------|---------------------|---------------------|------|---------------------|---------------------|
|                                                                                               | Events | Total       | Events   | Total       |               | M-H, Random, 95% CI | M-H, Random, 95% CI |      | M-H, Random, 95% CI | M-H, Random, 95% CI |
| <b>Caucasians</b>                                                                             |        |             |          |             |               |                     |                     |      |                     |                     |
| Peacock 1992                                                                                  | 9      | 86          | 9        | 87          | 2.4%          | 1.01                | [0.38, 2.69]        | 1992 |                     |                     |
| Mattu 1994                                                                                    | 14     | 90          | 22       | 123         | 3.4%          | 0.85                | [0.41, 1.76]        | 1994 |                     |                     |
| Jemaa 1995                                                                                    | 124    | 649         | 167      | 730         | 6.3%          | 0.80                | [0.61, 1.03]        | 1995 |                     |                     |
| Zhang 1995                                                                                    | 48     | 243         | 18       | 86          | 4.0%          | 0.93                | [0.51, 1.71]        | 1995 |                     |                     |
| Gagné 1999                                                                                    | 13     | 120         | 366      | 2138        | 4.2%          | 0.59                | [0.33, 1.06]        | 1999 |                     |                     |
| Moennig 2000                                                                                  | 31     | 229         | 37       | 150         | 4.5%          | 0.48                | [0.28, 0.81]        | 2000 |                     |                     |
| Arca 2000                                                                                     | 87     | 416         | 86       | 407         | 5.8%          | 0.99                | [0.71, 1.38]        | 2000 |                     |                     |
| VAN 2001                                                                                      | 78     | 516         | 91       | 589         | 5.9%          | 0.97                | [0.70, 1.35]        | 2001 |                     |                     |
| Myllykangas 2001                                                                              | 11     | 149         | 24       | 113         | 3.2%          | 0.30                | [0.14, 0.63]        | 2001 |                     |                     |
| Ferencak 2003                                                                                 | 101    | 479         | 33       | 200         | 5.2%          | 1.35                | [0.88, 2.09]        | 2003 |                     |                     |
| Martin 2004                                                                                   | 107    | 547         | 103      | 505         | 6.1%          | 0.95                | [0.70, 1.28]        | 2004 |                     |                     |
| Pasalić 2006                                                                                  | 19     | 132         | 29       | 98          | 3.8%          | 0.40                | [0.21, 0.77]        | 2006 |                     |                     |
| Ak 2007                                                                                       | 7      | 40          | 9        | 66          | 2.1%          | 1.34                | [0.46, 3.94]        | 2007 |                     |                     |
| Aydogan 2009                                                                                  | 14     | 41          | 6        | 23          | 1.9%          | 1.47                | [0.47, 4.56]        | 2009 |                     |                     |
| Abd 2011                                                                                      | 36     | 200         | 30       | 100         | 4.3%          | 0.51                | [0.29, 0.90]        | 2011 |                     |                     |
| Agirbasli 2011                                                                                | 11     | 97          | 17       | 81          | 2.9%          | 0.48                | [0.21, 1.10]        | 2011 |                     |                     |
| <b>Subtotal (95% CI)</b>                                                                      |        | <b>4034</b> |          | <b>5496</b> | <b>65.9%</b>  | <b>0.77</b>         | <b>[0.64, 0.93]</b> |      |                     |                     |
| Total events                                                                                  | 710    |             | 1047     |             |               |                     |                     |      |                     |                     |
| Heterogeneity: $\tau^2 = 0.07$ ; $\chi^2 = 31.56$ , $df = 15$ ( $P = 0.007$ ); $I^2 = 52\%$   |        |             |          |             |               |                     |                     |      |                     |                     |
| Test for overall effect: $Z = 2.65$ ( $P = 0.008$ )                                           |        |             |          |             |               |                     |                     |      |                     |                     |
| <b>Asians</b>                                                                                 |        |             |          |             |               |                     |                     |      |                     |                     |
| Sawano 2001                                                                                   | 11     | 93          | 25       | 96          | 3.1%          | 0.38                | [0.18, 0.83]        | 2001 |                     |                     |
| Yamada 2006                                                                                   | 243    | 1192        | 592      | 2291        | 6.8%          | 0.73                | [0.62, 0.87]        | 2006 |                     |                     |
| Baum 2006                                                                                     | 51     | 231         | 65       | 313         | 5.3%          | 1.08                | [0.71, 1.64]        | 2006 |                     |                     |
| Bhanushali 2010                                                                               | 12     | 90          | 23       | 150         | 3.3%          | 0.85                | [0.40, 1.80]        | 2010 |                     |                     |
| AshokKumar 2010                                                                               | 66     | 414         | 95       | 424         | 5.8%          | 0.66                | [0.46, 0.93]        | 2010 |                     |                     |
| Al-Jafari 2012                                                                                | 20     | 120         | 8        | 65          | 2.7%          | 1.43                | [0.59, 3.44]        | 2012 |                     |                     |
| Daoud 2013                                                                                    | 41     | 226         | 11       | 103         | 3.5%          | 1.85                | [0.91, 3.77]        | 2013 |                     |                     |
| Ahmadi 2015                                                                                   | 57     | 115         | 14       | 89          | 3.6%          | 5.26                | [2.67, 10.37]       | 2015 |                     |                     |
| <b>Subtotal (95% CI)</b>                                                                      |        | <b>2481</b> |          | <b>3531</b> | <b>34.1%</b>  | <b>1.08</b>         | <b>[0.71, 1.65]</b> |      |                     |                     |
| Total events                                                                                  | 501    |             | 833      |             |               |                     |                     |      |                     |                     |
| Heterogeneity: $\tau^2 = 0.28$ ; $\chi^2 = 44.10$ , $df = 7$ ( $P < 0.00001$ ); $I^2 = 84\%$  |        |             |          |             |               |                     |                     |      |                     |                     |
| Test for overall effect: $Z = 0.35$ ( $P = 0.73$ )                                            |        |             |          |             |               |                     |                     |      |                     |                     |
| <b>Total (95% CI)</b>                                                                         |        | <b>6515</b> |          | <b>9027</b> | <b>100.0%</b> | <b>0.85</b>         | <b>[0.71, 1.02]</b> |      |                     |                     |
| Total events                                                                                  | 1211   |             | 1880     |             |               |                     |                     |      |                     |                     |
| Heterogeneity: $\tau^2 = 0.12$ ; $\chi^2 = 75.67$ , $df = 23$ ( $P < 0.00001$ ); $I^2 = 70\%$ |        |             |          |             |               |                     |                     |      |                     |                     |
| Test for overall effect: $Z = 1.76$ ( $P = 0.08$ )                                            |        |             |          |             |               |                     |                     |      |                     |                     |
| Test for subgroup differences: $\chi^2 = 1.99$ , $df = 1$ ( $P = 0.16$ ), $I^2 = 49.9\%$      |        |             |          |             |               |                     |                     |      |                     |                     |

**Supplementary Figure 3. Stratified analysis based on ethnicity for the association between the *LPL* S447X polymorphism and CAD risk using dominant genetic model (GG+GC vs. CC).**

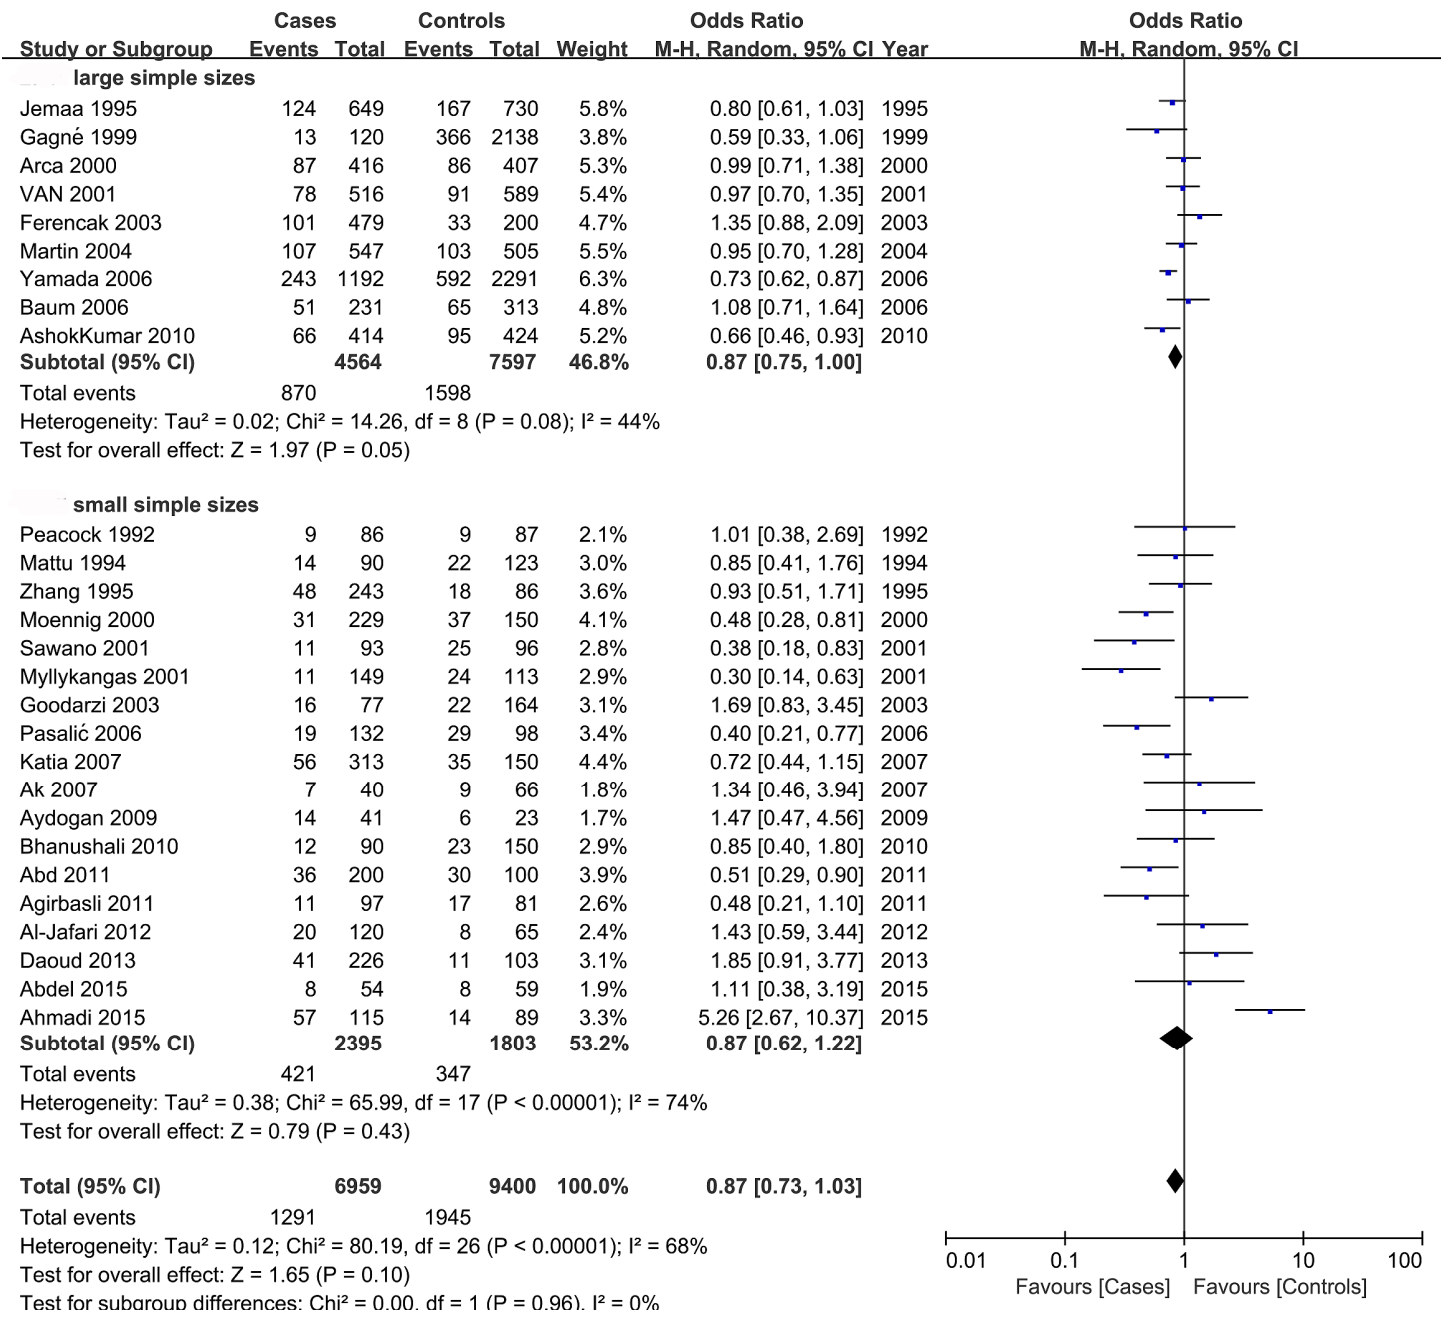

**Supplementary Figure 4. Stratified analysis based on sample size for the association between the *LPL* S447X polymorphism and CAD risk using dominant genetic model (GG+GC vs. CC).**

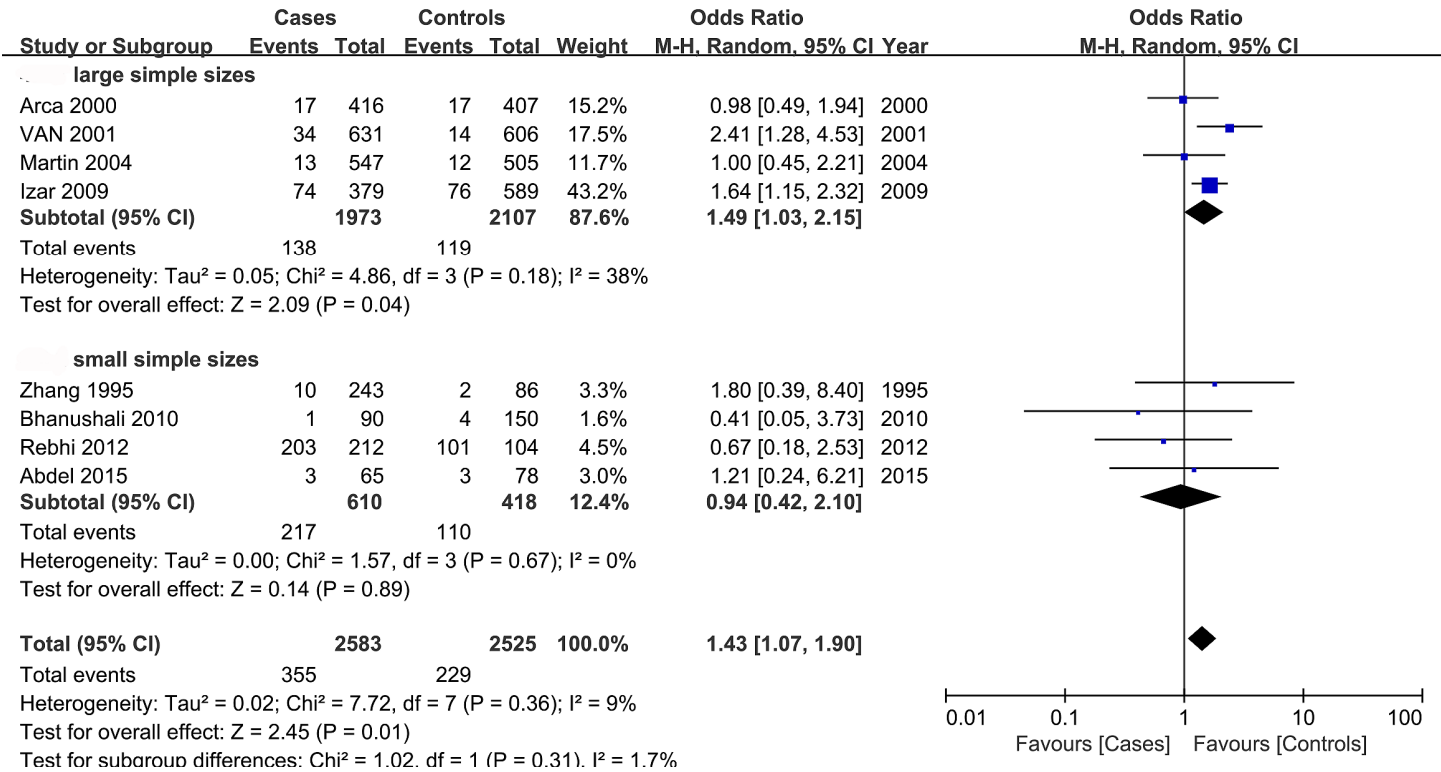

**Supplementary Figure 5. Stratified analysis based on sample size for the association between the *LPL* D9N polymorphism and CAD risk using dominant genetic model (AA+GA vs. GG).**

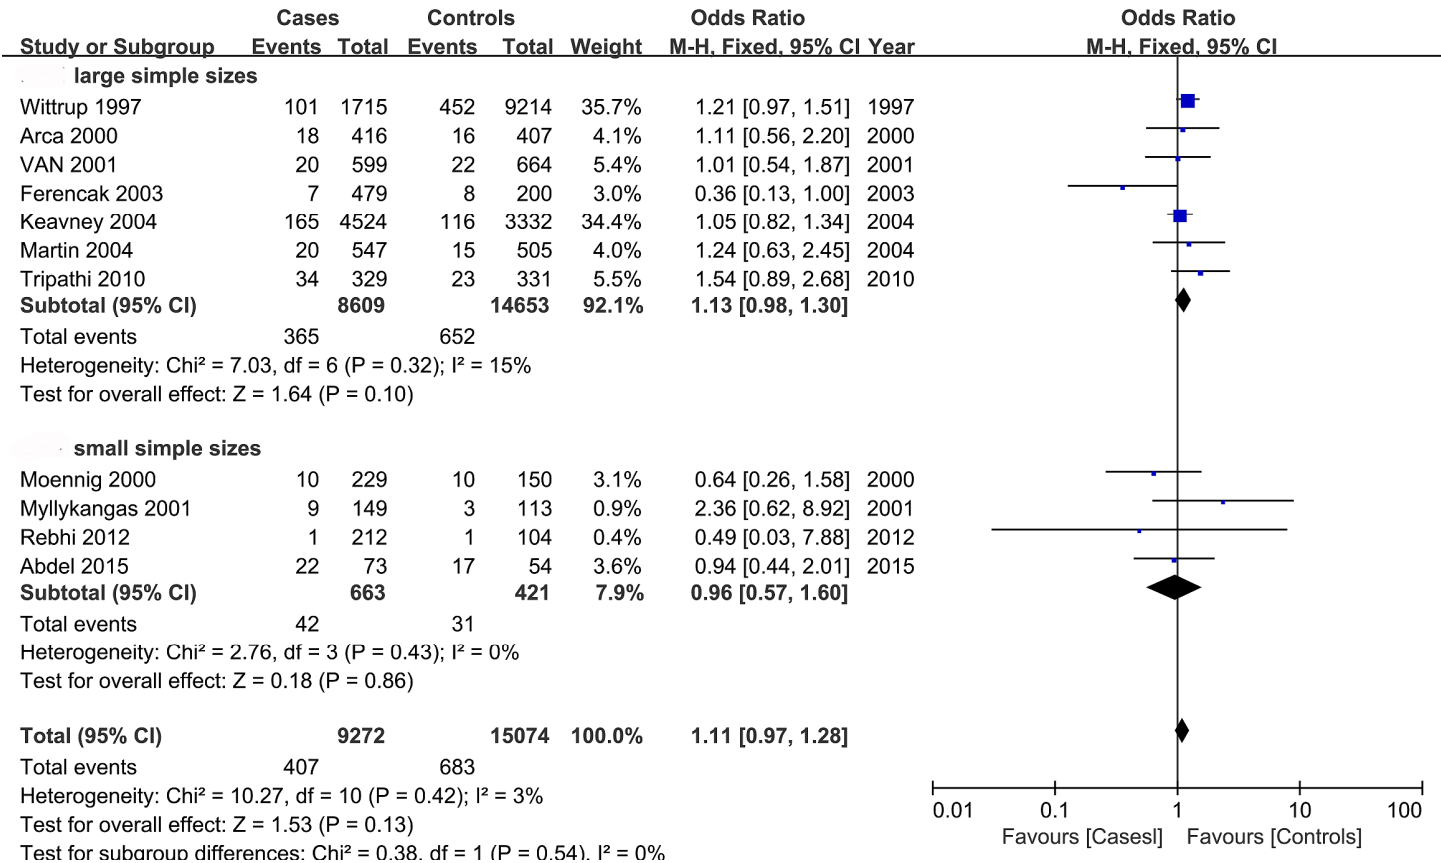

**Supplementary Figure 6. Stratified analysis based on sample size for the association between the *LPL* N291S polymorphism and CAD risk using dominant genetic model (GG+GA vs. AA).**

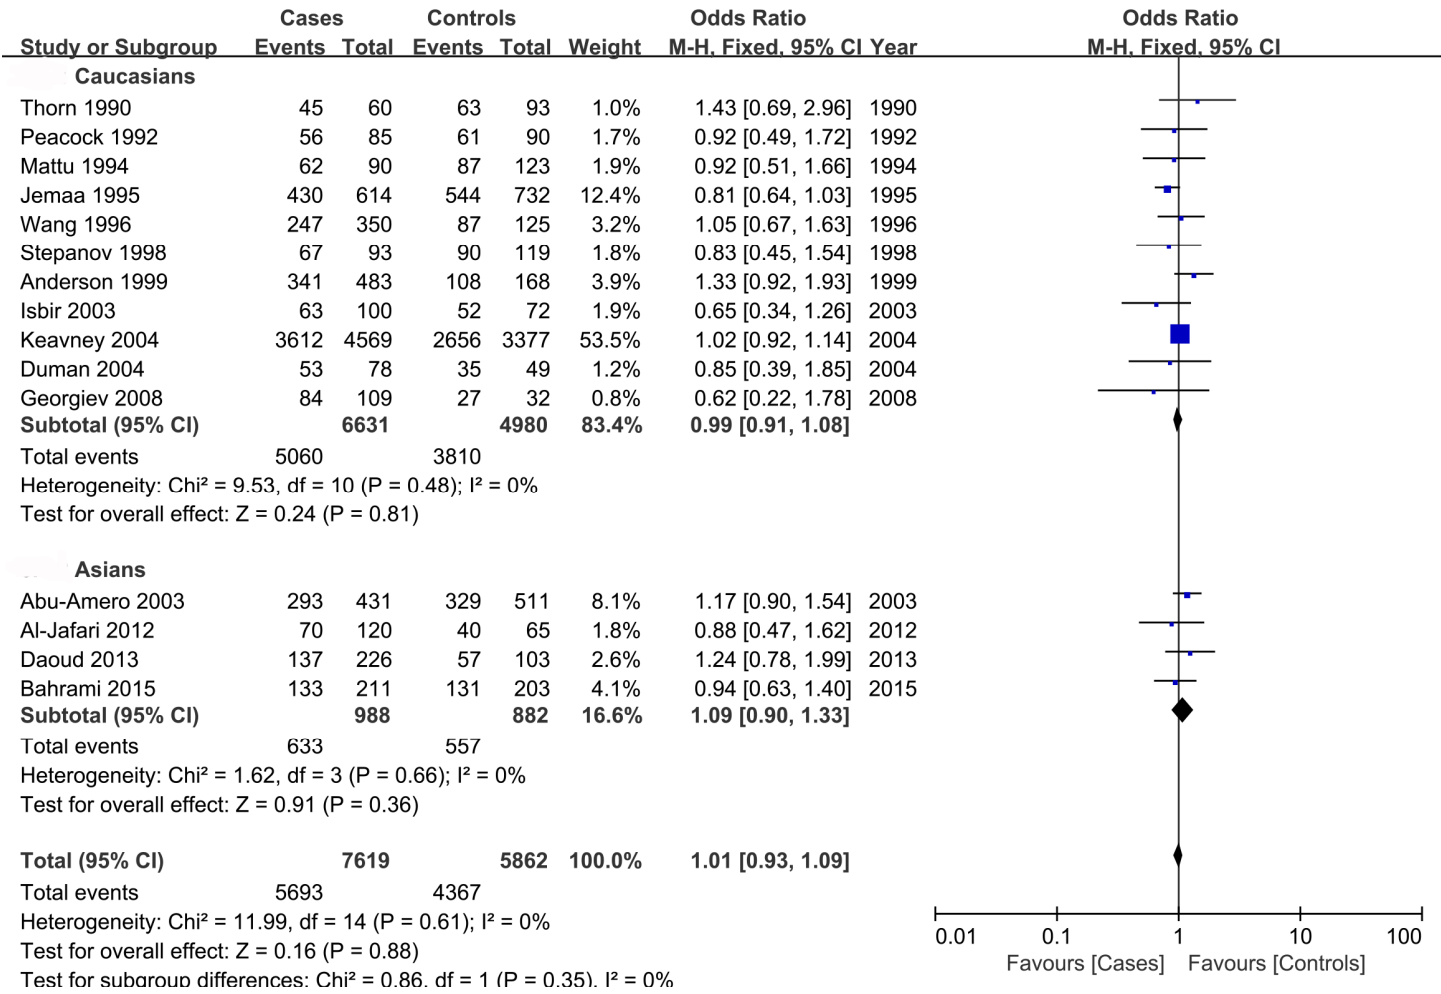

**Supplementary Figure 7. Stratified analysis based on ethnicity for the association between the *LPL* PvuII polymorphism and CAD risk using dominant genetic model (TT+CT vs. CC).**

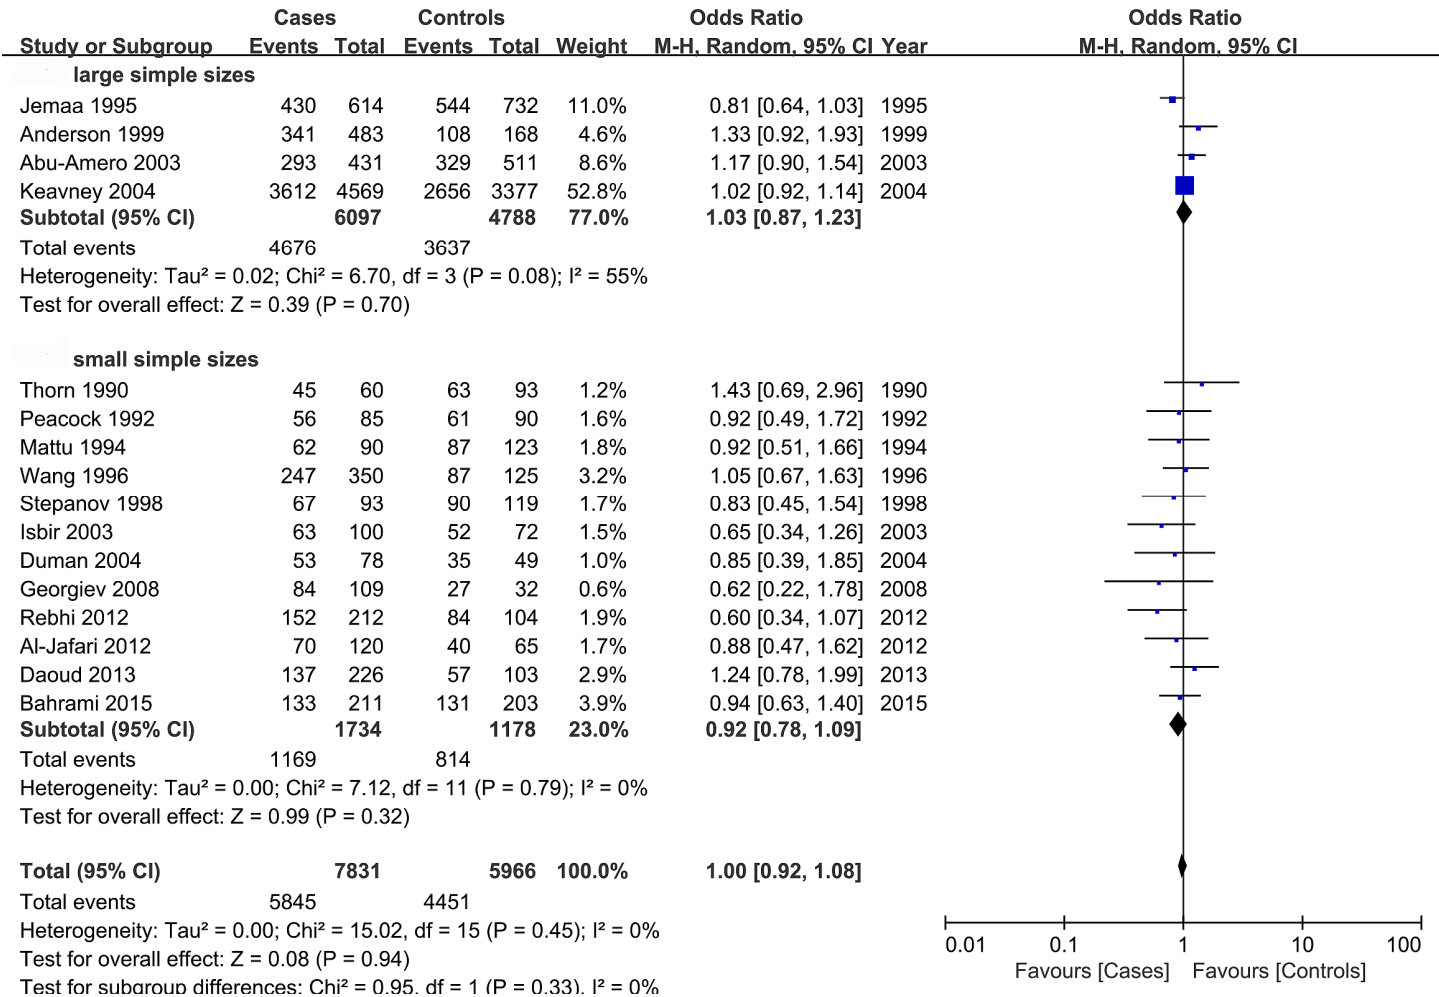

**Supplementary Figure 8. Stratified analysis based on sample size for the association between the *LPL* PvuII polymorphism and CAD risk using dominant genetic model (TT+CT vs. CC).**

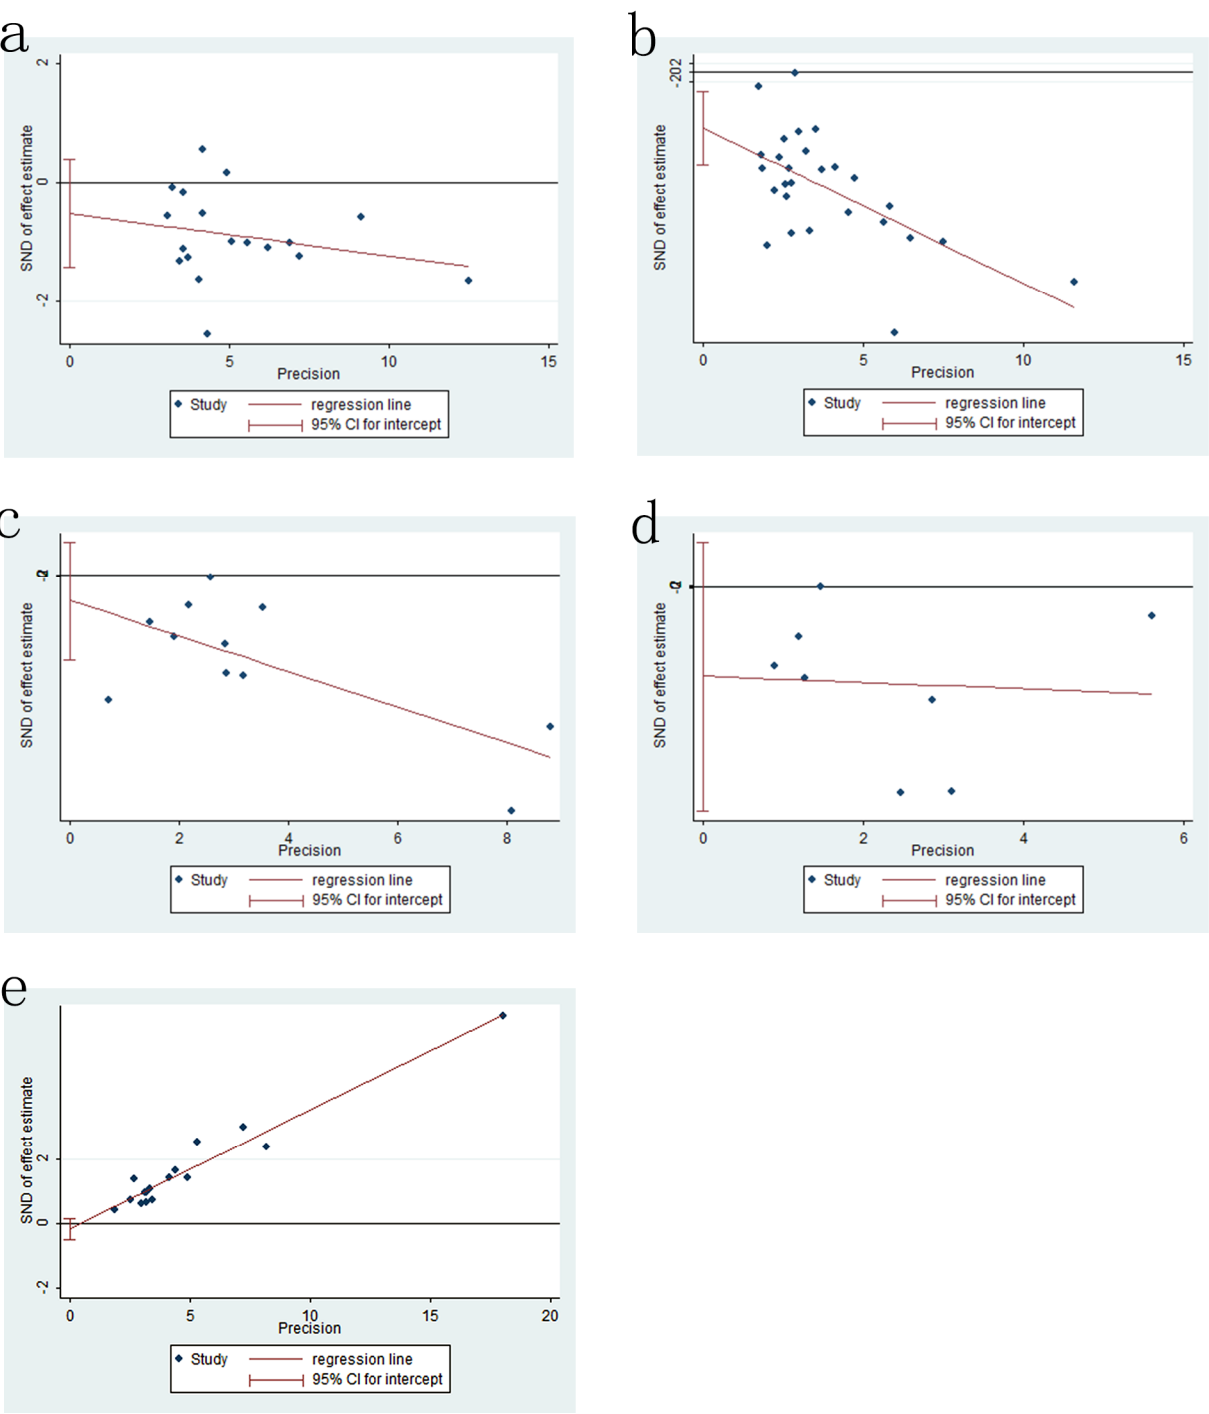

**Supplementary Figure 9. Egger’s regression test of publication bias for the association between the *LPL* gene polymorphisms and susceptibility to CAD.** (a). HindIII polymorphism; (b). S447X polymorphism; (c). N291S polymorphism; (d). D9N polymorphism; (e). PvuII polymorphism.

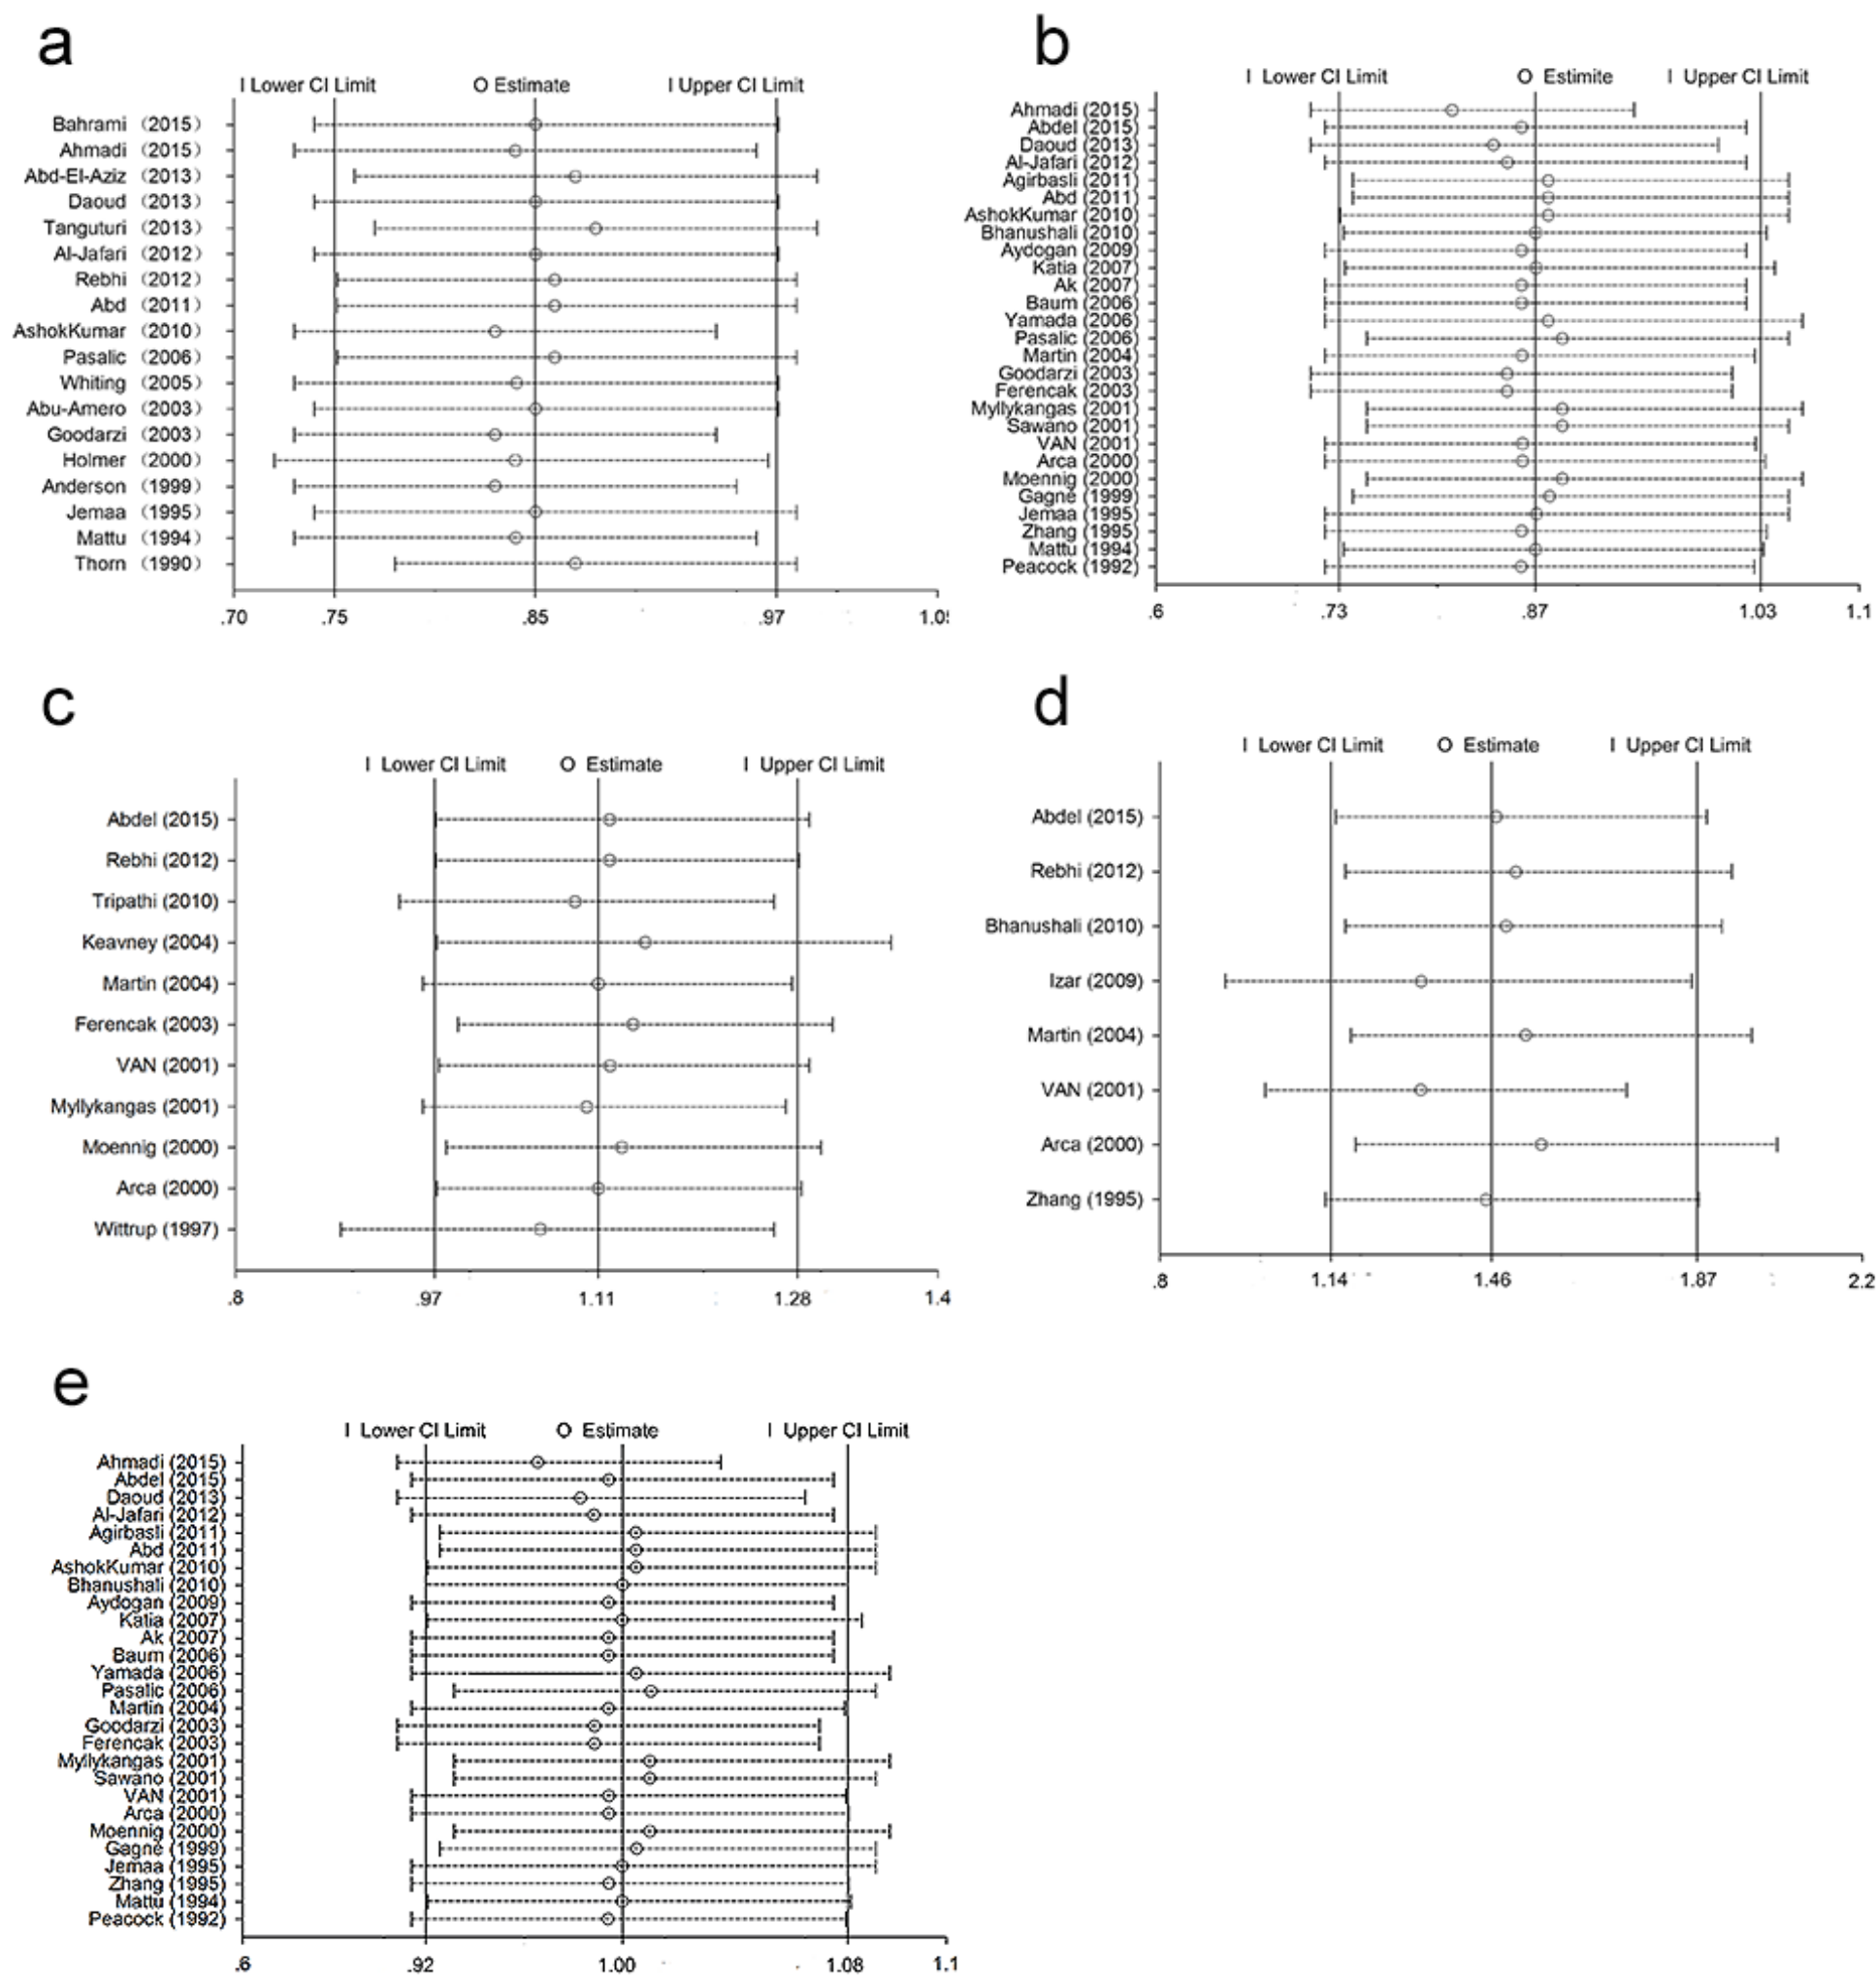

**Supplementary Figure 10. Sensitivity analysis on the correlation between *LPL* gene polymorphisms and susceptibility to CAD.**

(a). sensitivity analysis for HindIII and CAD risk; (b). sensitivity analysis for S447X and CAD risk; (c). sensitivity analysis for N291S and CAD risk; (d). Sensitivity analysis for D9N and CAD risk; (e). sensitivity analysis for PvuII and CAD risk;
